# Supplementary material
Source: PubMed Central journal article supplement (PMC3445703)
Supplement: NIHMS398086-supplement-01.pdf [file NIHMS398086-supplement-01.pdf]

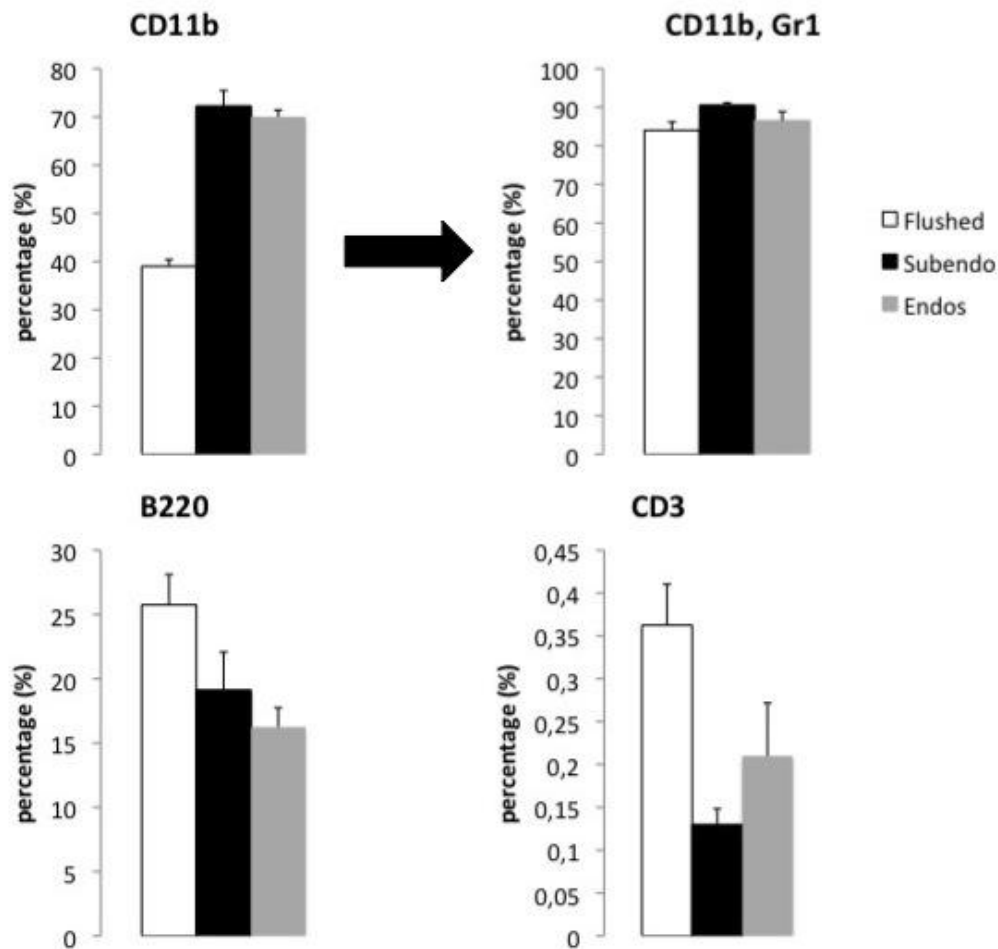

**Supplemental Figure 1.** Flow cytometry analyses of freshly isolated cells from all three isolated fractions herein compared: Flushed Bone Marrow, Subendosteal Fraction, and Endosteal Fraction. The cells were isolated as described in *Materials & Methods*. Briefly, the isolated cells were incubated with various labelled antibodies to assess the monocytes (CD11b) and granulocytes (Gr-1) (a measure of the cells within the myeloid compartment), B-lymphocytes (B220) and T-lymphocytes (CD3e). Four separate isolated batches were analysed separately. These data corroborate that hematopoietic cells are distinguishably distributed in all three niches, mostly when we compare central bone marrow to subendosteal and endosteal niches. Even though the hematopoietic cells were not evenly distributed in the marrow cavity, all of the hematopoietic cell lineages evaluated in the examined populations were present in all three fractions. In addition, nonadherent cells were removed (at least, the majority of them) after three days of incubation. Only a few myeloid cells remained attached in all three stromal cultures.
